# Supplementary material
Source: PubMed Central journal article supplement (PMC2668055)
Supplement: mmc1.pdf [file mmc1.pdf]

**Supplemental Data**

**Association of Genetic Variants at 3q22 with Nephropathy  
in Patients with Type 1 Diabetes Mellitus**

**Bing He, Anne-May Österholm, Anna Hoverfält, Carol Forsblom, Eyrún Edda Hjörleifsdóttir, Ann-Sofie Nilsson, Maikki Parkkonen, Janne Pitkaniemi, Ástrádur Hreidarsson, Cinzia Sarti, Amy Jayne McKnight, A. Peter Maxwell, Jaakko Tuomilehto, Per-Henrik Groop, and Karl Tryggvason**

This study would not have been possible without the assistance of the whole Finnish Diabetic Nephropathy Study Group:

Anjalankoski Health Center: S. Koivula, T. Uggeldahl

Central Finland Central Hospital: T. Forslund, A. Halonen, A. Koistinen, P. Koskiahio, M. Laukkanen, J. Saltevo, M. Tiihonen

Central Hospital of Åland Islands: A.-C. Blomqvist, M. Forsen, H. Granlund, B. Nyroos

Central Hospital of Kanta-Häme: P. Kinnunen, A. Orvola, T. Salonen, A. Vähänen

Central Hospital of Kymenlaakso: R. Paldanius, M. Riihelä, L. Ryysy

Central Hospital of Lansi-Pohja: P. Nylanden, A. Sademies

Central Ostrobothnian Hospital District: S. Anderson, B. Asplund, U. Byskata, T. Virkkala

City of Espoo Health Center (Espoonlahti): A. Nikkola, E. Ritola; (Leppävaara): L. Penttinen, H.-L. Siekkinen

City of Helsinki Health Center (Suutarila): A. Kaprio, J. Kärkkaäinen, B. Rantaeskola

City of Hyvinkää Health Center: S. Klemetti, T. Nyandoto, E. Rontu, S. Satuli-Autere

City of Vantaa Health Center (Korso): R. Toivonen, H. Virtanen; (Martinlaakso): M.

Laine, T. Pellonpää, R. Puranen; (Myyrämäki): A. Airas, J. Laakso, K. Rautavaara;

(Rekola): M. Erola, E. Jatkola; (Tikkurila): R. Lönnblad, A. Malm, J. Mäkelä, E.

Rautamo

Heinola Health Center: P. Hentunen, J. Lagerstam

Helsinki University Central Hospital (Department of Medicine, Division of Nephrology): H. Rosvall

Hospital of Lounais-Häme, Forssa: T. Kalliomäki, J. Koskelainen, R. Nikkanen, N.

Savolainen, H. Sulonen, E. Valtonen

Iisalmi Hospital: E. Toivanen

Jokilaakso Hospital, Jämsä: A. Parta, I. Pirttiniemi

Jorvi Hospital, Espoo: S. Aranko, S. Ervasti, R. Kauppinen-Mäkelin, A. Kuusisto, T. Leppälä, K. Nikkilä, L. Pekkonen

Kainuu Central Hospital: S. Jokelainen, P. Kemppainen, A.-M. Mankinen, M. Sankari

Kivela Hospital, Helsinki: A. Aimolahti, E. Huovinen

Koskela Hospital, Helsinki: V. Ilkka, M. Lehtimäki

Kouvola Health Center: E. Koskinen, T. Siitonen

Kuopio University Hospital: E. Huttunen, R. Ikäheimo, P. Karhapää, P. Kekäläinen, M.

Laakso, T. Lakka, E. Lampainen, L. Mykkänen, L. Nikanen, U. Tuovinen, I. Vauhkonen, E. Voutilainen

Kuusankoski Hospital: E. Kilkki, L. Riihelä

Laakso Hospital, Helsinki: T. Meriläinen, P. Poukka, R. Savolainen, N. Uhlenius

Lahti City Hospital: A. Mäkelä, M. Tanner

Lapland Central Hospital: L. Hyvärinen, S. Severinkangas, T. Tulokas

Lappee ranta Health Center: P. Linkola, I. Pulli

Lohja Hospital: T. Granlund, M. Saari, T. Salonen

Länsi Uusimaa Hospital, Tammisaari: I.-M. Jousmaa, J. Rinne

Malmi Hospital, Helsinki: H. Lanki, S. Moilanen, M. Tilly-Kiesi

Mikkeli Central Hospital: A. Gynther, R. Manninen, P. Nironen, M. Salminen, T.

Vänttinen

North Karelian Hospital: U.-M. Henttula, A. Rissanen, P. Kekäläinen, M. Voutilainen

Oulaskangas Hospital, Oulainen: E. Jokelainen, P.-L. Jylkkä, E. Kaarlela, J. Vuolaspuro

Oulu Health Center: L. Hiltunen, R. Häkkinen, S. Keinänen-Kiukaanniemi

Päijät-Häme Central Hospital: H. Haapamäki, A. Helanterä, H. Miettinen

Palokka Health Center (Palokka): P. Sapanen, L. Welling; (Vaajakoski): K. Mäkinen, P. Sapanen

Pieksämäki Hospital: V. Javtsenko, M. Tamminen

Pietarsaari Hospital: M.-L. Holmbäck, B. Isomaa

Pori City Hospital: P. Ahonen, P. Merensalo, K. Sävelä

Porvoo Hospital: M. Kallio, B. Rask

Raahe Hospital: A. Holma, M. Honkala, A. Tuomivaara, R. Vainionpää

Rauma Hospital: K. Laine, K. Saarinen, T. Salminen

Riihimäki Hospital: E. Immonen, L. Juurinen

Salo Hospital: A. Alanko, J. Lapinleimu, P. Rautio, M. Virtanen

Satakunta Central Hospital: M. Asola, M. Juhola, P. Kunelius, M.-L. Lahdenmäki, P. Pääkkönen, M. Rautavirta

Savonlinna Central Hospital: T. Pulli, P. Sallinen, E. Tolvanen, H. Valtonen, A. Vartia

Seinäjoki Central Hospital: E. Korpi, T. Latvala, E. Leijala

South Karelia Hospital District: T. Hotti, R. Härkönen, U. Nyholm, J. Toivanen

Tampere University Hospital: I. Ala-Houhala, T. Kuningas, P. Lampinen, M. Määttä, H. Oksala, T. Oksanen, K. Salonen, H. Tauriainen, S. Tulokas

Tiirismaa Health Center, Hollola: T. Kivelä, L. Petlin, L. Savolainen

Turku Health Center: I. Hämäläinen, H. Virtamo, M. Vähätalo

Turku University Central Hospital: K. Breitholz, R. Eskola, K. Metsärinne, U. Pietilä, P. Saarinen, R. Tuominen, S. Äyräpää

Vammala Hospital: I. Isomäki, R. Kroneld, M. Tapiolinna-Mäkelä

Vasa Central Hospital: S. Bergkulla, U. Hautamäki, V.-A. Myllyniemi, I. Rusk
